# Supplementary material for: Computational Design of High Energy RDX-Based Derivatives: Property Prediction, Intermolecular Interactions, and Decomposition Mechanisms
Source: MDPI journal article supplement (doi:10.3390/molecules26237199), 2021-11-27
Supplement: s1 [file s1]

# Computational Design of High Energy RDX-based Derivatives: Property Prediction, Intermolecular Interactions, and Decomposition Mechanisms

Li Tang and Weihua Zhu \*

Institute for Computation in Molecular and Materials Science, School of Chemistry and Chemical Engineering, Nanjing University of Science and Technology, Nanjing 210094, China

\* Correspondence: zhuwh@njust.edu.cn

**Table S1.** Calculated total energy ( $E_0$ ), zero-point energy ( $ZPE$ ), thermal correction ( $H_T$ ), and HOFs of the reference compounds.<sup>1</sup>

| Compound                        | $E_0(\text{a.u.})$ | $ZPE(\text{a.u.})$ <sup>1</sup> | $H_T(\text{kJ/mol})$ <sup>1</sup> | HOF(kJ/mol) <sup>2</sup> | HOF(kJ/mol) <sup>3</sup> |
|---------------------------------|--------------------|---------------------------------|-----------------------------------|--------------------------|--------------------------|
| NH <sub>3</sub>                 | -56.5826           | 0.0342                          | 10.05                             | -45.90                   | -45.10                   |
| NH <sub>2</sub> NO <sub>2</sub> | -261.1248          | 0.0392                          | 12.39                             | -3.20                    | -1.90                    |
| NH <sub>2</sub> NH <sub>2</sub> | -111.8976          | 0.0527                          | 12.23                             | 95.40                    | 110.66                   |

<sup>1</sup> The scaling factor for  $ZPE$  was 0.98 and the scaling for  $H_T$  was 0.96 [48]. <sup>2</sup> The experimental values were taken from Ref. [31]. <sup>3</sup> The calculated values were calculated at the G2 level.

**Table S2.** Calculated total energy ( $E_0$ ), zero-point energy ( $ZPE$ ), thermal correction ( $H_T$ ), gas-phase HOFs ( $\Delta H_{f,\text{gas}}$ ), heat of sublimation ( $\Delta H_{\text{sub}}$ ), and solid-phase HOFs ( $\Delta H_{f,\text{solid}}$ ) for the designed compounds.

| Compound | $E_0(\text{a.u.})$ | $ZPE(\text{a.u.})$ <sup>1</sup> | $H_T(\text{kJ/mol})$ <sup>2</sup> | $\Delta H_{f,\text{gas}}(\text{kJ/mol})$ | $\Delta H_{\text{sub}}(\text{kJ/mol})$ | $\Delta H_{f,\text{solid}}(\text{kJ/mol})$ |
|----------|--------------------|---------------------------------|-----------------------------------|------------------------------------------|----------------------------------------|--------------------------------------------|
| R1       | -1455.15           | 0.19                            | 56.04                             | 1250.84                                  | 164.82                                 | 1086.01                                    |
| R2       | -1155.98           | 0.14                            | 44.18                             | 1118.18                                  | 98.16                                  | 1020.03                                    |
| R3       | -971.37            | 0.12                            | 36.44                             | 699.88                                   | 103.83                                 | 596.05                                     |
| R4       | -1564.62           | 0.20                            | 58.74                             | 1445.52                                  | 131.05                                 | 1314.48                                    |
| R5       | -1713.76           | 0.18                            | 62.33                             | 1556.46                                  | 132.49                                 | 1423.97                                    |
| R6       | -1453.93           | 0.16                            | 52.92                             | 1334.44                                  | 116.90                                 | 1217.54                                    |
| R7       | -1529.15           | 0.17                            | 54.78                             | 1150.88                                  | 118.54                                 | 1032.34                                    |

<sup>1</sup> The correction factor for  $ZPE$  was 0.98.

<sup>2</sup> The correction factor for  $H_T$  was 0.96.

**Table S3.** Bond type and bond cutoff radius in the fragment analysis of the AIMD trajectory.

| Bond type | Cutoff radius(Å) | Bond type | Cutoff radius(Å) |
|-----------|------------------|-----------|------------------|
| C-C       | 2.31             | H-O       | 1.50             |
| C-H       | 1.63             | H-N       | 1.61             |
| C-O       | 2.15             | O-O       | 2.22             |
| C-N       | 2.20             | O-N       | 2.10             |
| H-H       | 1.11             | N-N       | 2.17             |

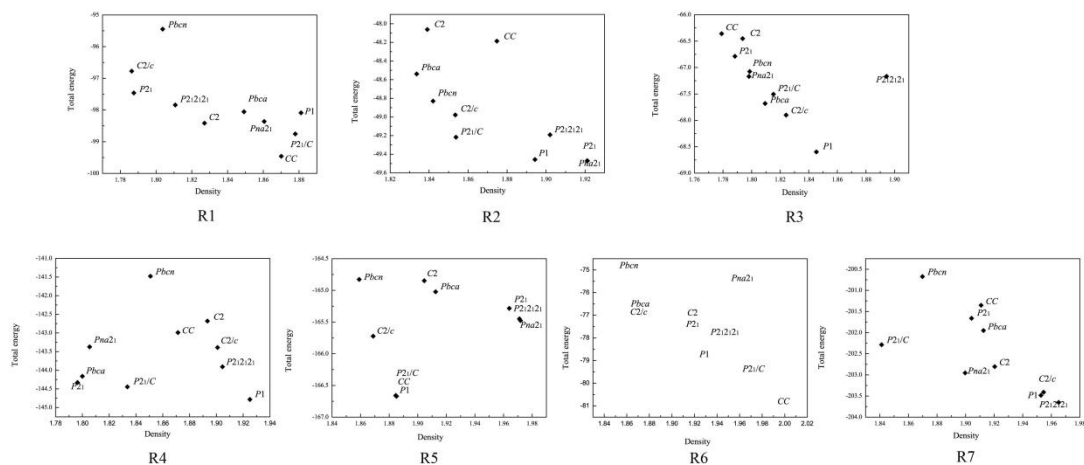

**Figure S1.** Relationship between crystal density and total energy of the packing for R1-R7.

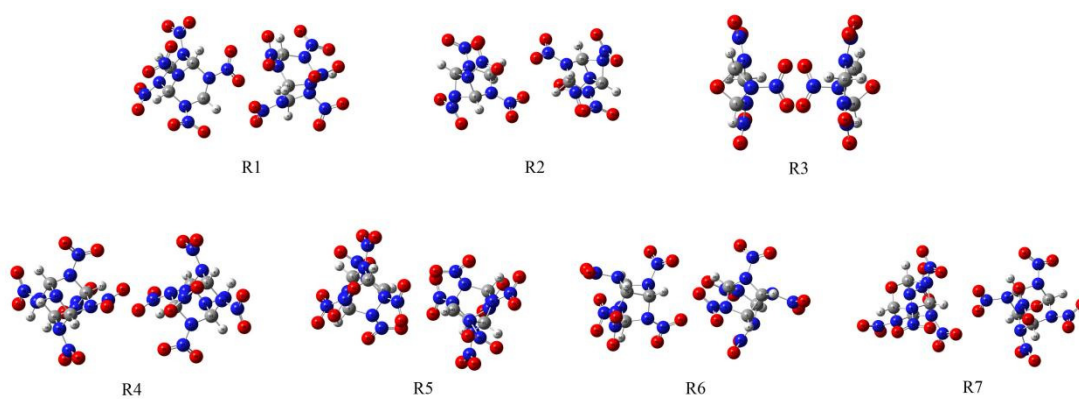

**Figure S2.** Optimized bimolecular structures and atom numbers.

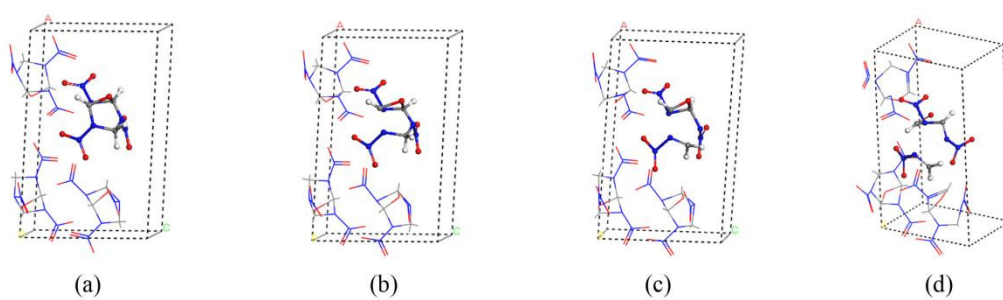

**Figure S3.** Snapshots of the decomposition mechanisms of (i).

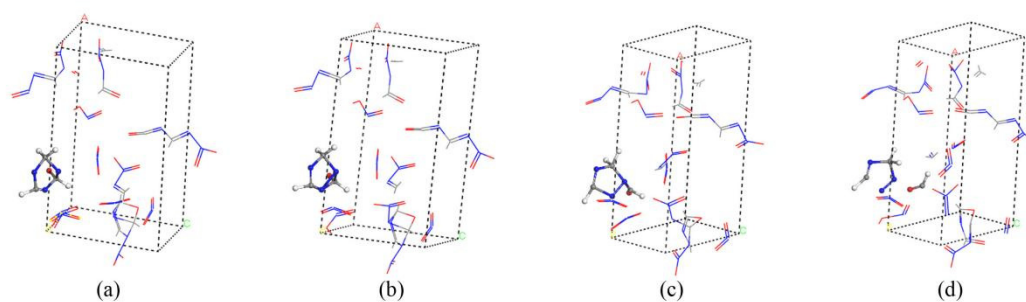

**Figure S4.** Snapshots of the decomposition mechanisms of (iii).

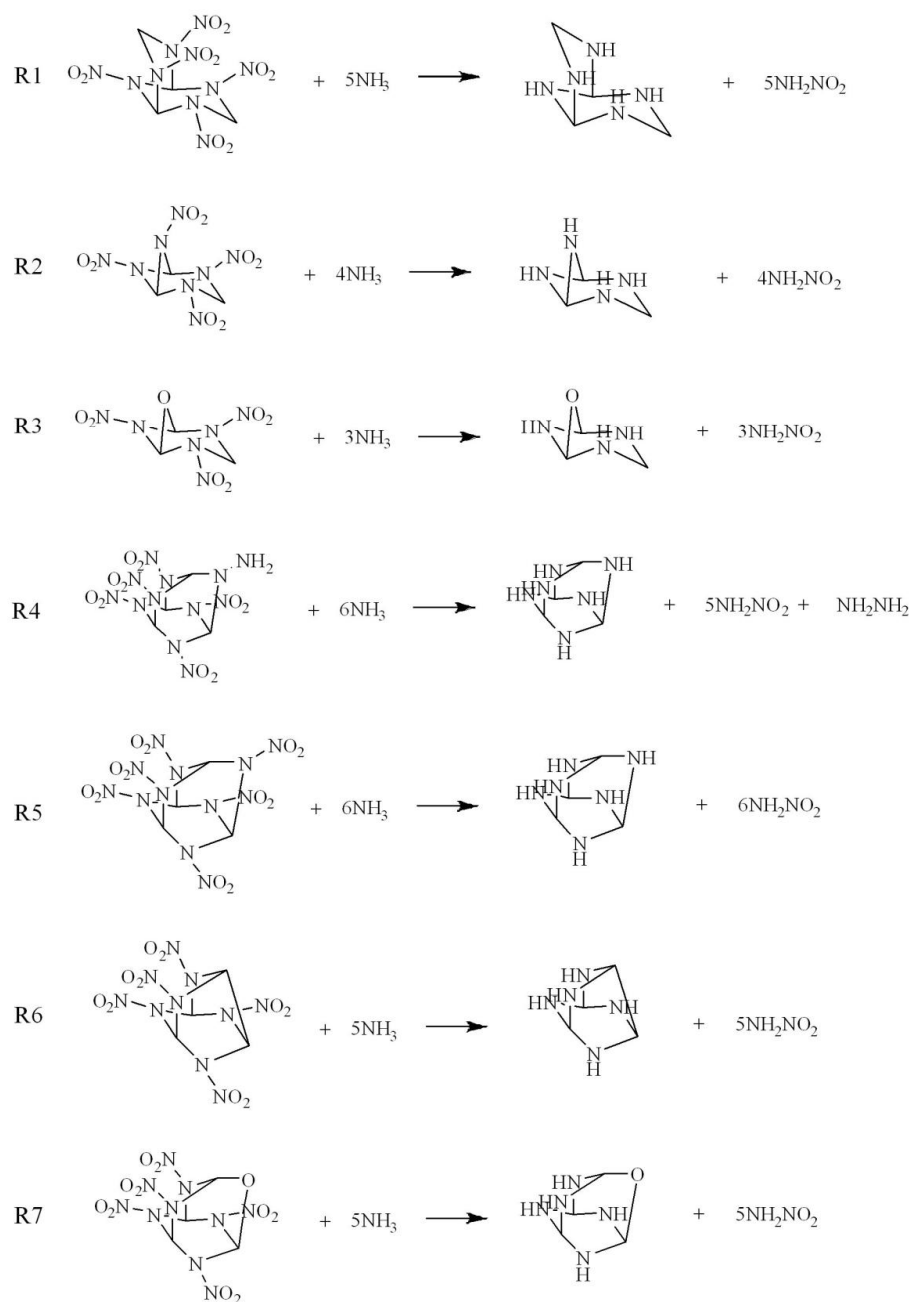

**Figure S5.** The corresponding isodesmic reactions of seven designed compounds (R1–R7).

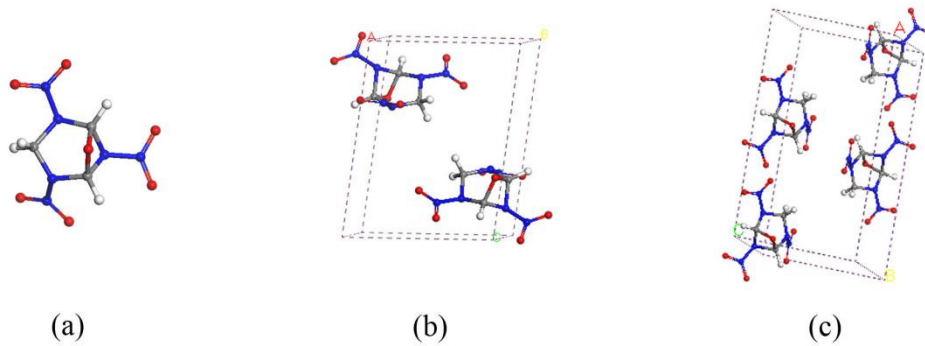

**Figure S6.** Molecular structures of R3 (a) and a unit cell (b) and a  $2 \times 1 \times 1$  supercell (c) of R3 crystal. Gray, blue, red, and white spheres stand for carbon, nitrogen, oxygen, and hydrogen atoms, respectively.
